# Supplementary material for: Safety of baricitinib for the treatment of rheumatoid arthritis over a median of 4.6 and up to 9.3 years of treatment: final results from long-term extension study and integrated database
Source: PubMed Central journal article supplement — Ann Rheum Dis. 2021 Oct 27;81(3):335–43. doi: 10.1136/annrheumdis-2021-221276 (PMC8862028; doi:10.1136/annrheumdis-2021-221276), 2021-10-27

## SUPPLEMENTAL MATERIAL

Supplementary Table 1. Baricitinib trials included in the integrated analysis

| Study                  | Treatments                                                  | Prior RA treatments                         | Rescue (week) <sup>a</sup> | Period length (weeks)                    |
|------------------------|-------------------------------------------------------------|---------------------------------------------|----------------------------|------------------------------------------|
| <b>PHASE 1b</b>        |                                                             |                                             |                            |                                          |
| I4V-MC-JADB            | Bari 15-mg<br>Bari 10-mg<br>Bari 5-mg BID                   | Background MTX                              | —                          | 4 open label                             |
| <b>PHASE 2</b>         |                                                             |                                             |                            |                                          |
| NCT01185353            | Placebo<br>Bari 8-mg<br>Bari 4-mg<br>Bari 2-mg<br>Bari 1-mg | MTX-IR<br>bDMARD naïve                      | —                          | 12 DB<br>12 BE<br>52 OE<br>52 OE         |
| NCT00902486            | Placebo<br>Bari 10-mg<br>Bari 7-mg<br>Bari 4-mg             | csDMARD-IR<br>Prior bDMARD allowed          | —                          | 12 DB<br>12 BE                           |
| NCT01469013<br>(Japan) | Placebo<br>Bari 8-mg<br>Bari 4-mg<br>Bari 2-mg<br>Bari 1-mg | MTX-IR<br>Prior bDMARD allowed <sup>b</sup> | —                          | 12 DB<br>52 BE                           |
| <b>PHASE 3</b>         |                                                             |                                             |                            |                                          |
| RA-BEAM                | Placebo                                                     | MTX-IR                                      | 16                         | 24 DB                                    |
| NCT01710358            | Bari 4-mg<br>Adalimumab                                     | bDMARD naïve                                |                            | 28 DB <sup>c</sup><br>52 DB <sup>d</sup> |
| RA-BEACON              | Placebo                                                     | TNFi-IR                                     | 16                         | 24 DB                                    |
| NCT01721044            | Bari 4-mg<br>Bari 2-mg                                      |                                             |                            |                                          |
| RA-BUILD               | Placebo                                                     | csDMARD-IR                                  | 16                         | 24 DB                                    |
| NCT01721057            | Bari 4-mg<br>Bari 2-mg                                      | bDMARD naïve                                |                            |                                          |
| RA-BEGIN               | MTX mono                                                    | DMARD naïve                                 | 24                         | 52 DB                                    |
| NCT01711359            | Bari 4-mg mono<br>Bari 4-mg+MTX                             |                                             |                            |                                          |
| RA-BALANCE             | Placebo                                                     | MTX-IR                                      | 16                         | 24 DB                                    |
| NCT02265705            | Bari 4-mg                                                   |                                             |                            | 28 OE                                    |

**LTE<sup>c</sup>**

---

|             |           |        |     |               |
|-------------|-----------|--------|-----|---------------|
| RA-BEYOND   | Bari 4-mg | Varied | PRN | Up to 9 years |
| NCT01885078 | Bari 2-mg |        |     |               |

---

<sup>a</sup>First available rescue.

<sup>b</sup>Prior bDMARDs allowable, however patients could not have stopped treatment due to insufficient response.

<sup>c</sup>Double-blind with no placebo.

<sup>d</sup>Trial RA-BEAM had 24 weeks of placebo control and 52 weeks of active control.

<sup>e</sup>Studies contributing to LTE RA-BEYOND included Phase 2 trial NCT01185353 and Phase 3 trials NCT02265705, RA-BEAM, RA-BEACON, RA-BUILD, and RA-BEGIN.

bari, baricitinib; bDMARD, biological DMARD; BE, blinded extension with no placebo; BID, twice-daily; DB, double-blind; csDMARD, conventional synthetic DMARD; DMARD, disease-modifying antirheumatic drug; IR, incidence rate; LTE, long-term extension; MTX, methotrexate; OE, open-label extension; PRN, pro re nata (as needed); RA, rheumatoid arthritis; TNFi, tumor necrosis factor-inhibitor.

**Supplementary Table 2.** Demographics and measures of disease activity

|                                                | <b>Ever on 2-mg<sup>a</sup></b><br><b>(N=1077)</b> | <b>Ever on 4-mg<sup>a</sup></b><br><b>(N=3401)</b> | <b>All-bari-RA<sup>b</sup></b><br><b>(N=3770)</b> |
|------------------------------------------------|----------------------------------------------------|----------------------------------------------------|---------------------------------------------------|
| Age at baseline, years, mean (SD)              | 53.1 (12.1)                                        | 52.6 (12.2)                                        | 52.7 (12.2)                                       |
| Female, n (%)                                  | 832 (77.3)                                         | 2691 (79.1)                                        | 2983 (79.1)                                       |
| Race, n (%)                                    |                                                    |                                                    |                                                   |
| American Indian or Alaskan Native              | 53 (4.9)                                           | 162 (4.8)                                          | 168 (4.5)                                         |
| Asian                                          | 300 (27.9)                                         | 1048 (30.9)                                        | 1115 (29.6)                                       |
| Black or African American                      | 27 (2.5)                                           | 80 (2.4)                                           | 97 (2.6)                                          |
| Native Hawaiian or other Pacific Islanders     | 0                                                  | 2 (0.1)                                            | 2 (0.1)                                           |
| White                                          | 688 (63.9)                                         | 2078 (61.2)                                        | 2354 (62.6)                                       |
| Multiple                                       | 9 (0.8)                                            | 26 (0.8)                                           | 26 (0.7)                                          |
| Duration of RA <sup>c</sup> , years, mean (SD) | 8.6 (8.2)                                          | 7.3 (8.1)                                          | 7.7 (8.1)                                         |
| Region, n (%)                                  |                                                    |                                                    |                                                   |
| United States/Canada                           | 221 (20.5)                                         | 641 (18.8)                                         | 840 (22.3)                                        |
| Central/South America, Mexico                  | 221 (20.5)                                         | 738 (21.7)                                         | 760 (20.2)                                        |
| Asia (excluding Japan)                         | 123 (11.4)                                         | 432 (12.7)                                         | 445 (11.8)                                        |
| Japan                                          | 132 (12.3)                                         | 489 (14.4)                                         | 514 (13.6)                                        |
| European Union                                 | 253 (23.5)                                         | 708 (20.8)                                         | 783 (20.8)                                        |
| Rest of the world                              | 127 (11.8)                                         | 393 (11.6)                                         | 428 (11.4)                                        |
| Corticosteroid use, yes, n (%)                 | 487 (45.2)                                         | 1768 (52.0)                                        | 1911 (50.7)                                       |
| Concomitant MTX use, yes, n (%)                | 528 (49.0)                                         | 2526 (74.3)                                        | 2979 (79.0)                                       |
| DAS28-CRP                                      | 3.7 (2.0)                                          | 4.9 (1.5)                                          | 5.1 (1.5) <sup>d</sup>                            |

<sup>a</sup>Originating study baseline is used for sex, race, and region; time of first dose “ever on 2-mg” and “ever on 4-mg” is used for age, time from RA diagnosis, methotrexate use, corticosteroid use, and DAS28-CRP.

<sup>b</sup>Originating study baseline is used for sex, race, and region; time of first dose with baricitinib is used for age, time from RA diagnosis, methotrexate use, corticosteroid use, and DAS28-CRP

<sup>c</sup>Time from RA diagnosis.

<sup>d</sup>The N for the All-bari-RA group is smaller (N=3717) for disease activity measures than for demographics because baseline disease activity measures are only available for Phase 2/3 studies. bari, baricitinib; CDAI, Clinical Disease Activity Index; DAS28-CRP, Disease Activity Score 28-joint count high-sensitivity C-reactive protein; MTX, methotrexate; n, number of patients in the specified category; N, number of patients in the analysis set; RA, rheumatoid arthritis; SD, standard deviation.

**Supplementary Table 3.** Adverse events detail

|                                                                                                                                      | <b>All-bari-RA (N=3770)<br/>[PYE=15,114]</b> |
|--------------------------------------------------------------------------------------------------------------------------------------|----------------------------------------------|
| <b><i>TEAE in ≥5% of the All-bari RA analysis set, n (%) [EAIR]</i></b>                                                              |                                              |
| Nasopharyngitis                                                                                                                      | 625 (16.6) [4.1]                             |
| Upper respiratory tract infection                                                                                                    | 610 (16.2) [4.0]                             |
| Bronchitis                                                                                                                           | 575 (15.3) [3.8]                             |
| Urinary tract infection                                                                                                              | 527 (14.0) [3.5]                             |
| Herpes zoster                                                                                                                        | 402 (10.7) [2.7]                             |
| Hypertension                                                                                                                         | 373 (9.9) [2.5]                              |
| Back pain                                                                                                                            | 347 (9.2) [2.3]                              |
| Influenza                                                                                                                            | 343 (9.1) [2.3]                              |
| Blood creatine phosphokinase increased                                                                                               | 338 (9.0) [2.2]                              |
| Arthralgia                                                                                                                           | 310 (8.2) [2.1]                              |
| Cough                                                                                                                                | 282 (7.5) [1.9]                              |
| Pharyngitis                                                                                                                          | 269 (7.1) [1.8]                              |
| Gastroenteritis                                                                                                                      | 237 (6.3) [1.6]                              |
| Headache                                                                                                                             | 262 (6.9) [1.7]                              |
| Hypercholesterolemia                                                                                                                 | 261 (6.9) [1.7]                              |
| Rheumatoid arthritis                                                                                                                 | 257 (6.8) [1.7]                              |
| Anemia                                                                                                                               | 252 (6.7) [1.7]                              |
| Hyperlipidemia                                                                                                                       | 242 (6.4) [1.6]                              |
| Diarrhea                                                                                                                             | 222 (5.9) [1.5]                              |
| Sinusitis                                                                                                                            | 213 (5.6) [1.4]                              |
| Pneumonia                                                                                                                            | 210 (5.6) [1.4]                              |
| Nausea                                                                                                                               | 210 (5.6) [1.4]                              |
| Osteoarthritis                                                                                                                       | 195 (5.2) [1.3]                              |
| <b><i>Temporary interruption due to AEs (by system organ class) with ≥0.2 EAIR of the All-bari RA analysis set, n (%) [EAIR]</i></b> |                                              |
| Infections and infestations                                                                                                          | 839 (22.3) [5.6]                             |
| Gastrointestinal disorders                                                                                                           | 127 (3.4) [0.8]                              |
| Surgical and medical procedures                                                                                                      | 122 (3.2) [0.8]                              |
| Investigations                                                                                                                       | 106 (2.8) [0.7]                              |
| Musculoskeletal and connective tissues disorders                                                                                     | 96 (2.5) [0.6]                               |

|                                                                             |                |
|-----------------------------------------------------------------------------|----------------|
| Blood and lymphatic system disorders                                        | 91 (2.4) [0.6] |
| Injury, poisoning, and procedural complications                             | 86 (2.3) [0.6] |
| Respiratory, thoracic, and mediastinal disorders                            | 78 (2.1) [0.5] |
| Cardiac disorders                                                           | 41 (1.1) [0.3] |
| Hepatobiliary disorders                                                     | 40 (1.1) [0.3] |
| Skin and subcutaneous tissue disorders                                      | 38 (1.0) [0.3] |
| Nervous system disorders                                                    | 37 (1.0) [0.2] |
| Renal and urinary disorders                                                 | 34 (0.9) [0.2] |
| Neoplasms benign, malignant and unspecified<br>(including cysts and polyps) | 31 (0.8) [0.2] |

---

***Permanent discontinuation due to AEs (by system organ class) with  $\geq 0.2$  EAIR of the All-bari RA analysis set, n (%) [EAIR]***

---

|                                                                             |                 |
|-----------------------------------------------------------------------------|-----------------|
| Infections and infestations                                                 | 186 (4.9) [1.2] |
| Neoplasms benign, malignant and unspecified<br>(including cysts and polyps) | 138 (3.7) [0.9] |
| Investigations                                                              | 66 (1.8) [0.4]  |
| Blood and lymphatic system disorders                                        | 58 (1.5) [0.4]  |
| Respiratory, thoracic, and mediastinal disorders                            | 41 (1.1) [0.3]  |

---

AE, adverse event; bari, baricitinib; EAIR, exposure-adjusted incidence rate; n, number of patients in the specified category; N, number of patients in the analysis set; PYE, patient-years of exposure; RA, rheumatoid arthritis; TEAE, treatment-emergent adverse event.

**Supplementary Table 4.** Changes in selected laboratory and clinical chemistry values

|                                                  | <b>All-bari-RA<br/>(N=3770)</b> | <b>EAIR<br/>(PY=14,744)</b> |
|--------------------------------------------------|---------------------------------|-----------------------------|
| Treatment-emergent shifts, n/NAR (%)             |                                 |                             |
| LDL, $\geq 160$ mg/dL                            | 1068/2699 (39.6)                | 7.2                         |
| HDL, $< 40$ mg/dL (=low)                         | 356/3126 (11.4)                 | 2.4                         |
| CPK                                              |                                 |                             |
| >5x ULN ( $\geq$ Grade 3)                        | 139/3560 (3.9)                  | 0.9                         |
| Hemoglobin                                       |                                 |                             |
| <10 mg/dL                                        | 424/3640 (11.6)                 | 2.9                         |
| <8 mg/dL                                         | 43/3741 (1.1)                   | 0.3                         |
| Neutrophils, $< 1000$ cells/mm <sup>3</sup>      | 48/3620 (1.3)                   | 0.3                         |
| Lymphocytes, $< 500$ cells/mm <sup>3</sup>       | 193/3736 (5.2)                  | 1.3                         |
| Platelets                                        |                                 |                             |
| <150,000 cells/mm <sup>3</sup> ( $\geq$ Grade 1) | 156/3652 (4.3)                  | 1.1                         |
| >600,000 cells/mm <sup>3</sup>                   | 159/3716 (4.3)                  | 1.1                         |
| ALT                                              |                                 |                             |
| $\geq 3x$ ULN                                    | 185/3734 (5.0)                  | 1.3                         |
| $\geq 5x$ ULN                                    | 53/3736 (1.4)                   | 0.4                         |
| AST                                              |                                 |                             |
| $\geq 3x$ ULN                                    | 111/3735 (3.0)                  | 0.8                         |
| $\geq 5x$ ULN                                    | 18/3738 (0.5)                   | 0.1                         |

**Note:** ~~Data up to rescue~~. Lipid samples were collected at Weeks 0 [baseline], 12, and 24 and other hematology/clinical assessments were collected at Weeks 0, 1, 2, 4, 8, 12, 14, 16, 20, and 24.

National Cholesterol Education Program (NCEP) ATP III guidelines (2002) was used for lipids. Common Terminology Criteria for Adverse Events (CTCAE) v3.0 used for other laboratory parameters.

ALT, alanine aminotransferase; AST, aspartate transaminase; Bari, baricitinib; CPK, ~~creatinine~~creatinine phosphokinase; EAIR, exposure-adjusted incidence rate; HDL, high density lipoprotein; LDL, low density lipoprotein; LLN, lower limit of normal; n, number of patients in the specified category; N, number of patients in the analysis set; NAR, number at risk; PYE, patient-years of exposure; RA, rheumatoid arthritis; ULN, upper limits of normal.





**Supplementary Figure 1.** SMR in the All-bari analysis set and by sex

Standardized mortality rate in the All-bari-RA analysis set and by sex from the All-bari-RA analysis set.

Data were estimated using 2019 US population mortality calculated as compared to the general US population with the same age distribution.

bari, baricitinib; RA, rheumatoid arthritis; SMR, standardized mortality ratio; US, United States.

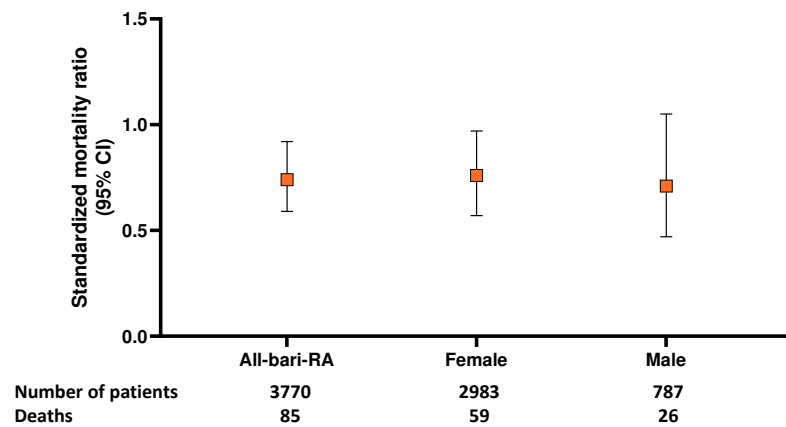

**Supplementary Figure 2. Observed malignancies excluding NMSC in the All-bari-RA analysis set and expected malignancies excluding NMSC based on SEER incidence distribution (2013-2017)**

Note: Age group categories are based on the average age of the ages at the beginning and end of baricitinib treatment or follow-up.  
bari, baricitinib; NMSC, nonmelanoma skin cancer; RA, rheumatoid arthritis; SEER, Surveillance, Epidemiology, and End Results

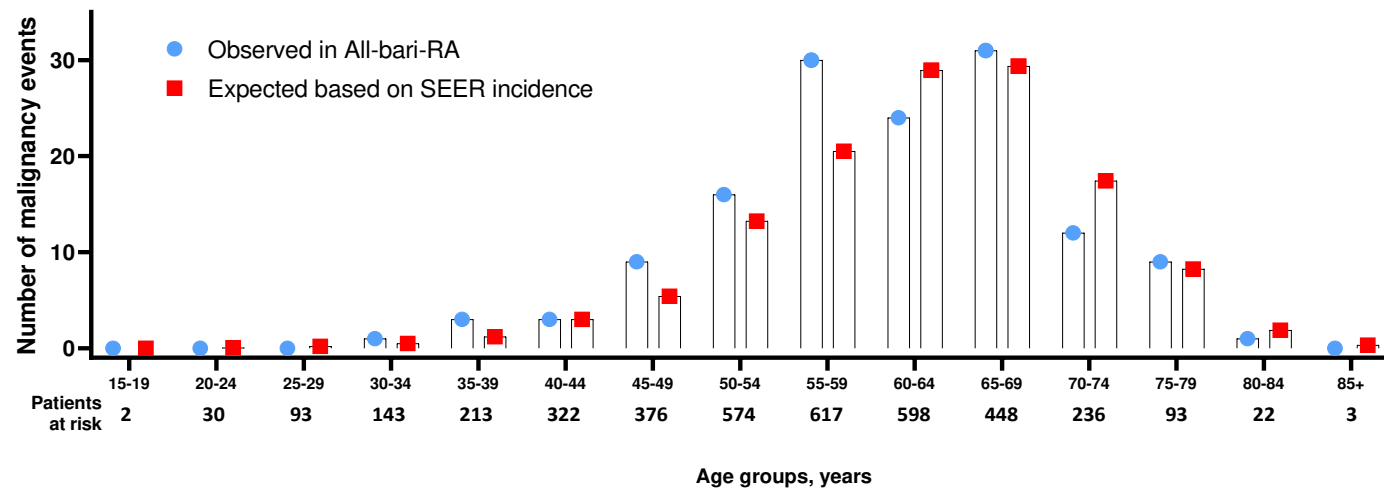

Supplement: annrheumdis-2021-221276supp001.pdf [file annrheumdis-2021-221276supp001.pdf]
